# Supplementary material
Source: Elsevier journal article supplement (https://www.sciencedirect.com/science/article/pii/S1988885621000262)
Supplement: mmc1 [file S1988885621000262:mmc1.doc]

**ANEXO I**

1. Rediseñar agendas: citación de los pacientes que precisaban visitas presenciales cada 20minutos para evitar coincidencias en salas de espera.

| Si | No | *Screening* COVID-19 |
| --- | --- | --- |
|  |  | En los últimos 14 días usted o algún miembro de su casa ha tenido contacto con algún paciente COVID-19? |
|  |  | Ha tenido fiebre en los últimos 14 días? |
|  |  | Tiene o ha tenido síntomas como tos, dificultad respiratoria, diarrea, nauseas, dolor generalizado, perdida olfato o gusto en los últimos 14 días? |

1. Filtrado y detección de síntomas de posible Covid-19: El día antes de la cita se realizó una encuesta telefónica destinada a detectar sintomatología compatible con infección en los 15 días previos. Ver Tabla:

Diseño espacio seguro: apertura de una planta de consultas externa en edificio anexo al hospital cerrada durante el transcurso de la pandemia. En base a este espacio, se calculó el número de pacientes en función del número de despachos y las salas de espera que se disponían.
Se destinaron 8 despachos para visitar y 4 salas de espera para poder acomodar de forma segura a los pacientes que fueran llegando para ser visitados.

Personal administrativo se encargó de la recepción y ubicación en las salas de espera en función del consultorio al que debían dirigirse.

Las agendas se modificaron a visitas cada 20 minutos, pudiendo haber cada hora un máximo de 16 pacientes esperando (32 si hubiera un acompañante) distribuidos en cuatro salas de espera con 97 asientos pudiéndose garantizar una distancia de seguridad entre cada persona.

1. Recomendaciones de asistencia:
   1. Puntualidad
   2. Sin acompañante si fuera posible
   3. Portar mascarilla o se le facilitaba en la entrada
   4. Uso del gel hidroalcohólico para higiene de manos previo a la entrada ofrecido en la puerta del edificio.
   5. Respetar la distancia de seguridad
